# Supplementary material for: Insight into the biochemical characteristics of a novel glucokinase gene mutation
Source: Springer Nature journal article supplement (doi:10.1007/s00439-010-0914-4), 2010-11-22

**Supplementary Material**

**Legend for Figure 1.**

Electrophoretogram of wild-type and mutant GK proteins by 15 % SDS-PAGE. Lane 3: protein marker, lane 1 and 2: wild-type GK protein, lane 4 and 5: mutant GK protein. The molecular weight of wild-type and mutant GK proteins were shown as predictive position as reported.

**Figure 1.**

105 kd

70 kd

50 kd

1 2 3 4 5

Wild-type

Mutant

Maker


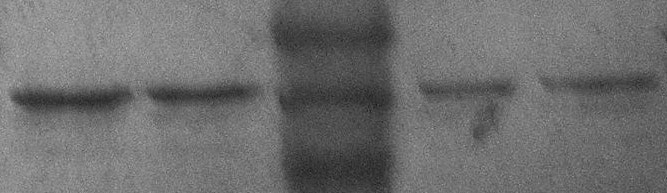

Supplement: MOESM1 [file 439_2010_914_MOESM1_ESM.doc]
